# Supplementary material for: Detection of trace mercury ions in water with a bovine-serum-albumin-modified Au@SiNWA surface-enhanced-Raman-scattering sensor
Source: Royal Society of Chemistry journal article supplement (doi:10.1039/d1ay00639h), 2021-01-01
Supplement: d1ay00639h1.pdf [file d1ay00639h1.pdf]

## Supporting information

### Detection of trace mercury ions in water with a bovine-serum-albumin-modified Au@SiNWAs surface-enhanced-Raman-scattering sensor

Chengshan Fan <sup>a,b</sup>, Xin Zhang <sup>a,b,\*</sup>, Jia Meng Lv <sup>a,b</sup>, Jiahao Bai <sup>a,b</sup>, Zenghui Qiu <sup>a,b</sup>, Yong Mei Zhao <sup>c,d</sup>, Zheng Long Wu <sup>e</sup>, Hai Jun Xu <sup>a,b,\*</sup>

<sup>a</sup> Beijing Bioprocess Key Laboratory, Beijing University of Chemical Technology, Beijing 100029, China

<sup>b</sup> College of Mathematics & Physics, Beijing University of Chemical Technology, Beijing 100029, China

<sup>c</sup> Engineering Research Center for Semiconductor Integrated Technology, Institute of Semiconductors, Chinese Academy of Sciences, Beijing, 100083, China

<sup>d</sup> Center of Materials Science and Optoelectronics Engineering, University of Chinese Academy of Sciences, Beijing, 100049, China

<sup>e</sup> Analytical and Testing Center, Beijing Normal University, Beijing, 100875, China

\* Corresponding authors at: Beijing Bioprocess Key Laboratory, Beijing University of Chemical Technology, Beijing 100029, China.

*E-mail address:* zhxin@mail.buct.edu.cn (X. Zhang), hjxu@mail.buct.edu.cn (H. J. Xu).

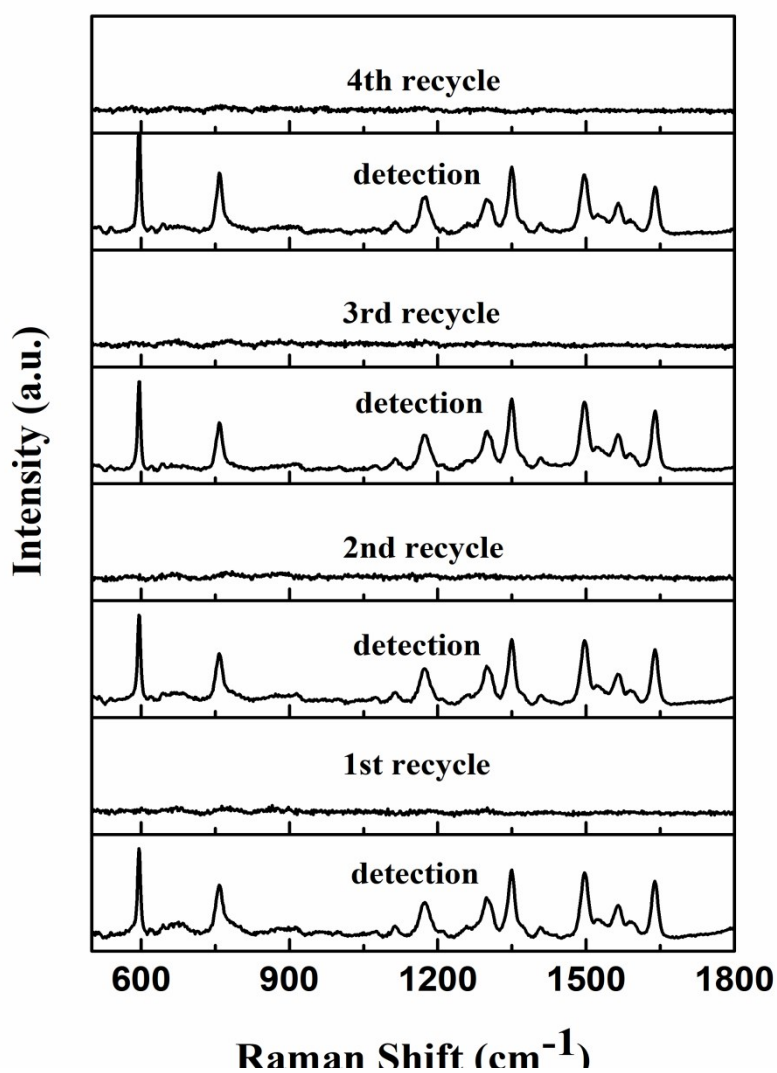

**Figure S1.** Raman test results of Au@SiNWAs and SiNWAs on  $10^{-3}$  M R6G respectively.

The recyclability of the SERS substrate is demonstrated in Figure S1, which plots spectra from an initial SERS detection and after washing with 0.1M  $\text{NaBH}_4$  aqueous solution several times. This data could be attributed to that hydrides derived from  $\text{NaBH}_4$  have a higher binding affinity to Au NPs than the Au-S bond and thus replaces

them completely. Hence, the SERS analysis indicates that the Au@SiNWAs substrate has great recyclability.

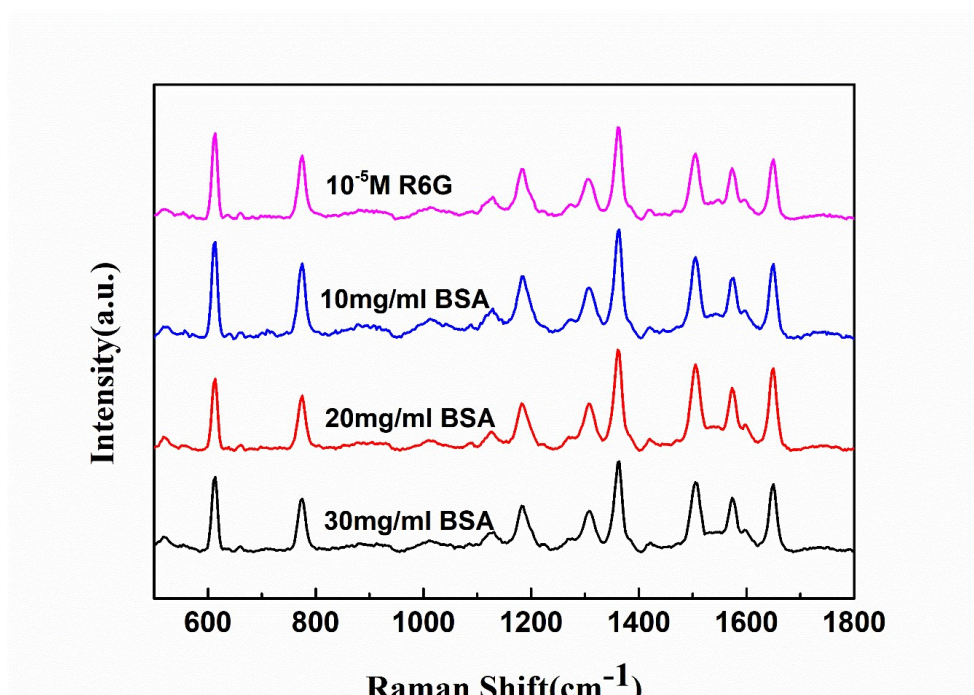

**Figure S2.** SERS signal of  $10^{-5}$  M R6G, obtained from Au@SiNWAs modified with different concentrations of BSA

The substrate was respectively modified with 10, 20, and 30 mg/mL BSA to perform SERS test for  $10^{-5}$  M R6G solution under the same conditions, and the results are shown in Figure S2. The concentration of BSA has no effect on the Raman signal of R6G, that is, it will not increase or decrease the intensity of the detected Raman peak.

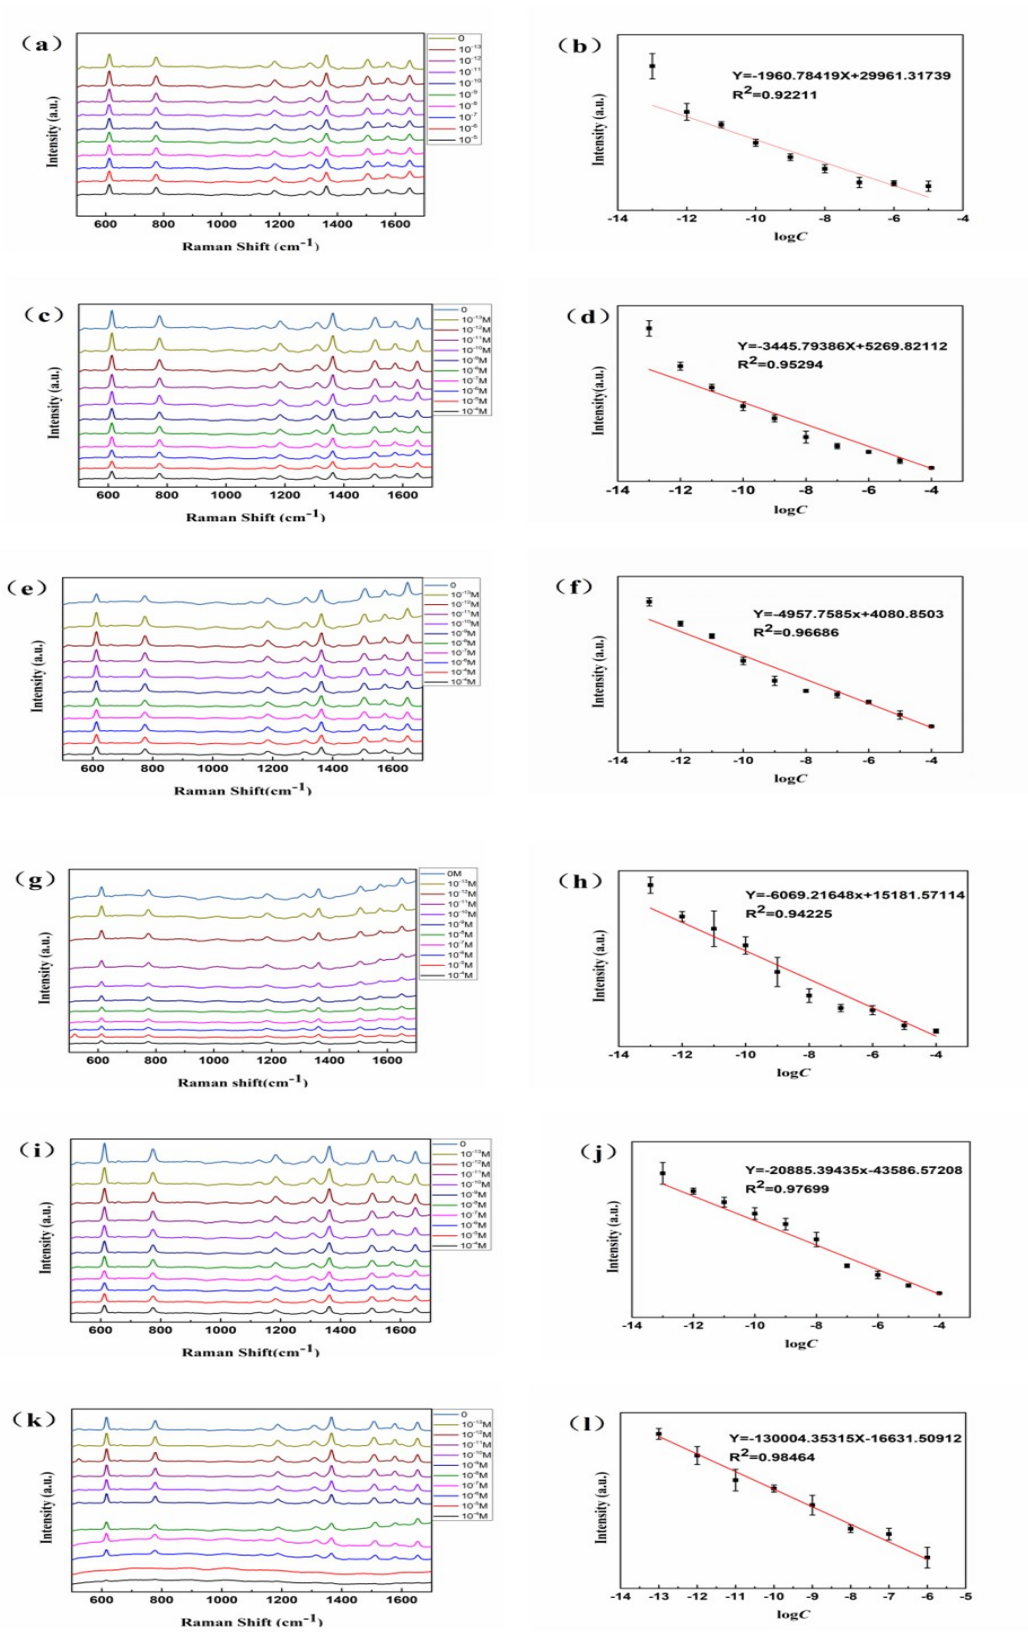

**Figure S3.** SERS results of  $Hg^{2+}$  ions detection; the Au@SiNWAs substrates are modified with six different concentrations of BSA. different concentrations of BSA

Table S1. Results of the Raman signal decrease when different concentrations of BSA are used for  $10^{-12}$  M  $\text{Hg}^{2+}$  ions detection.

| Concentration (mg/mL) | decrease of integrated intensity | decrease of peak height | $R^2$   |
|-----------------------|----------------------------------|-------------------------|---------|
| 5                     | 12%                              | 14%                     | 92.211% |
| 10                    | 16%                              | 25%                     | 95.294% |
| 20                    | 14%                              | 9%                      | 96.686% |
| 30                    | 10%                              | 16%                     | 94.225% |
| 50                    | 8.6%                             | 13%                     | 97.699% |
| 100                   | 9%                               | 11%                     | 98.464% |

Six different concentrations of BSA, 5, 10, 20, 30, 50, and 100 mg/mL, are used to observe the influence of BSA concentration on the SERS results of a series of concentration gradients of mercury ions. Figure S3 shows the results. At different concentration of BSA, the SERS intensity of R6G for  $\text{Hg}^{2+}$  ions detection is changed, but the Raman peak intensity at  $\sim 1361 \text{ cm}^{-1}$  is linearly fitted to  $\text{Hg}^{2+}$  concentration. The decreasing trend of the integrated intensity and the height of the  $\sim 1361 \text{ cm}^{-1}$  Raman peak are listed in Table S1. The most obvious decreasing trend occurs when the BSA concentration is 10 mg/mL, while the Raman signal still decreases significantly at the limit detection concentration of  $10^{-12}$  M. Since the Raman signal intensity will change greatly at  $10^{-12}$  M and  $10^{-7}$  M, the  $R^2$  obtained by linear fitting is for reference only. Therefore, in our experiments BSA with a concentration of 10 mg/mL is chosen for the detection of  $\text{Hg}^{2+}$  ions.
